# Supplementary material for: Daphnetin contributes to allergen-induced Th2 cytokine expression and type 2-immune responses in atopic dermatitis and asthma
Source: Royal Society of Chemistry journal article supplement (doi:10.1039/d2fo02518c), 2022-01-01
Supplement: d2fo02518c1.pdf [file d2fo02518c1.pdf]

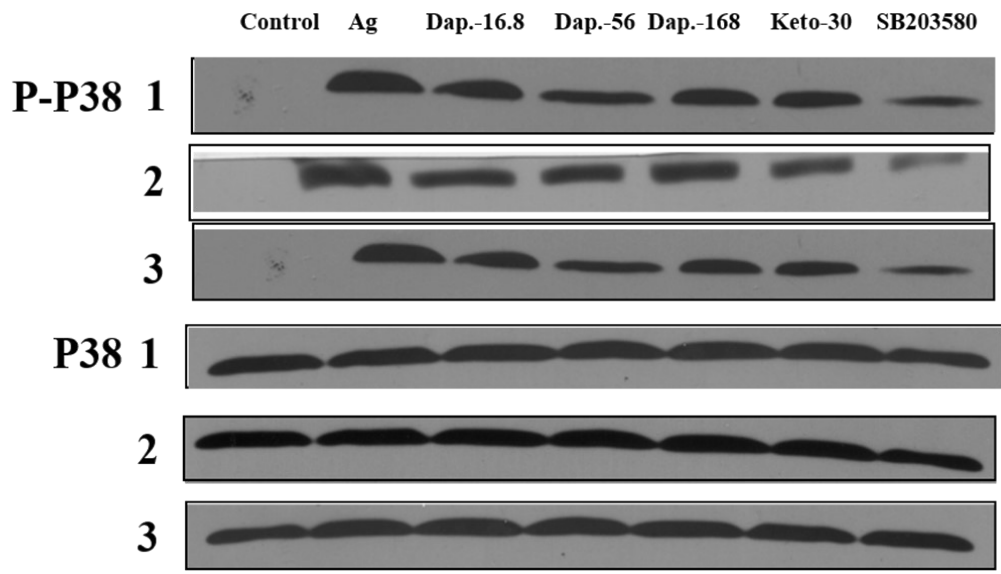

**Figure S1.** Effect of Dap. (16.8, 56, 168 $\mu$ M) Ag induced expression of P-ERK ERK, P-JNK JNK, and P-P38 P38 protein in RBL-2H3 cells. The indicated dose of U0126 (10 $\mu$ M) · SP600125 (25 $\mu$ M) · SB203580 (25 $\mu$ M), and Keto (30 $\mu$ M) were given as positive control. (n=3)

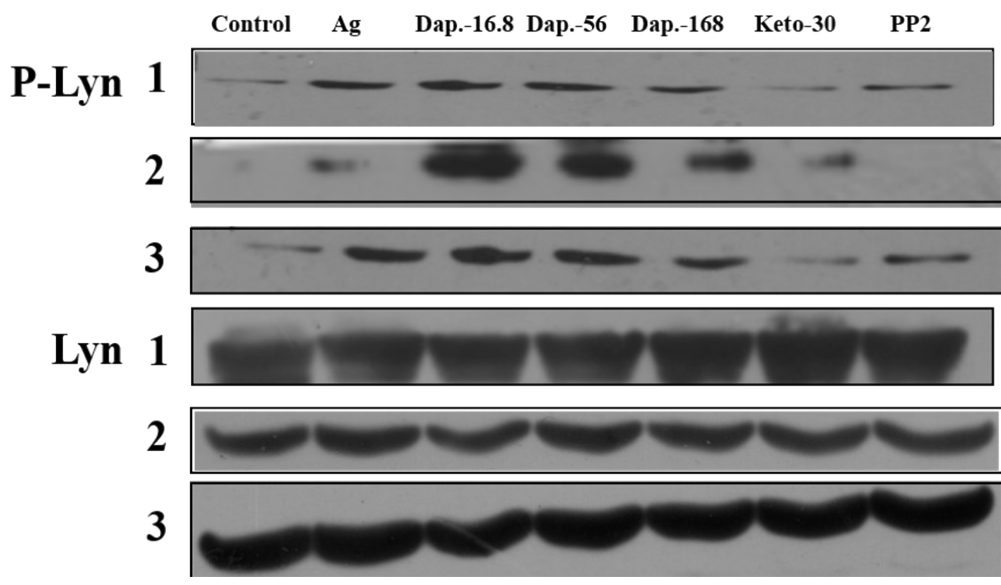

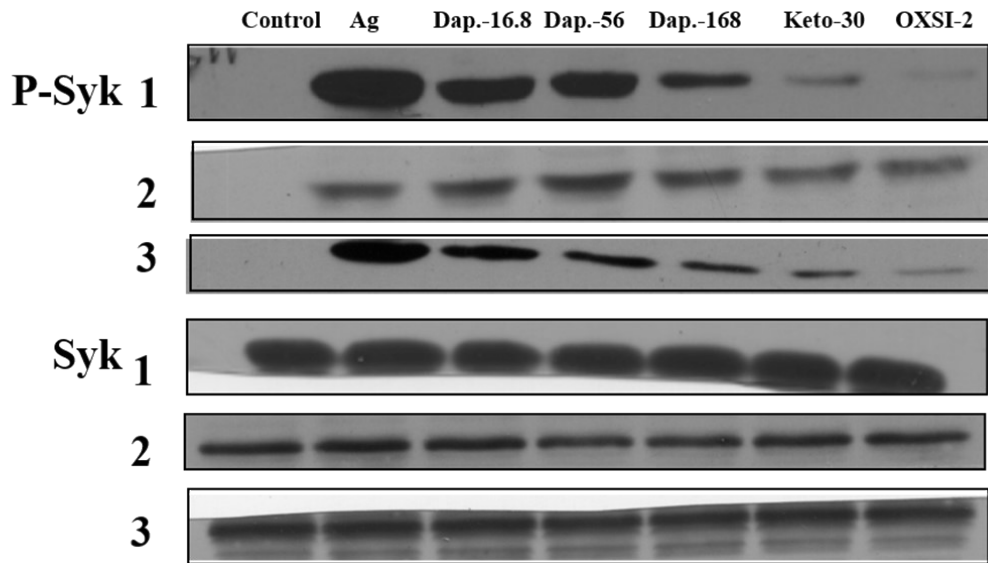

**Fig S2.** Effect of Dap. (16.8, 56, 168 $\mu$ M) Ag induced expression of P-Lyn, Lyn, P-Syk, Syk, protein in RBL-2H3 cells. The indicated dose of PP2 (10 $\mu$ M), OXSI-2 (0.1 $\mu$ M), and Keto (30 $\mu$ M) was given as positive control. (n=3)
